# Supplementary material for: Extraction and Characterization of Fiber and Cellulose from Ethiopian Linseed Straw: Determination of Retting Period and Optimization of Multi-Step Alkaline Peroxide Process
Source: MDPI journal article supplement (doi:10.3390/polym15020469), 2023-01-16
Supplement: s1 [file s1]

# Extraction and Characterization of Fiber and Cellulose from Ethiopian Linseed Straw: Determination of Retting Period and Optimization of Multi-Step Alkaline Peroxide Process

Kibrom Feleke <sup>1</sup>, Ganesh Thothadri <sup>2,\*</sup>, Habtamu Beri Tufa <sup>1</sup>, Ali A. Rajhi <sup>3</sup>  
and Gulam Mohammed Sayeed Ahmed <sup>1,4</sup>

<sup>1</sup> Department of Manufacturing Engineering, School of Mechanical, Chemical and Materials Engineering, Adama Science and Technology University, P.O. Box 1888, Adama, Ethiopia; kbm17@gmail.com (K.F.); habtamu.beri@astu.edu.et (H.B.T.); drgmsa786@gmail.com (G.M.S.A.)

<sup>2</sup> Department of Materials Engineering, School of Mechanical, Chemical and Materials Engineering, Adama Science and Technology University, P.O. Box 1888, Adama, Ethiopia

<sup>3</sup> Department of Mechanical Engineering, College of Engineering, King Khalid University, Abha 61421, Saudi Arabia; arajhi@kku.edu.sa

<sup>4</sup> Centre of Excellence (COE) for Advanced Manufacturing Engineering, Program of Mechanical Design and Manufacturing Engineering, School of Mechanical, Chemical and Materials Engineering, ASTU, P.O. Box 1888, Adama, Ethiopia

\* Correspondence: ganesh\_reliez@yahoo.co.in

**Table S1.** Taguchi L<sub>9</sub> orthogonal array layout for cellulose extraction.

| Experimental Run | Concentration (%) | Temperature (°C) | Time (h) |
|------------------|-------------------|------------------|----------|
| 1                | -1                | -1               | -1       |
| 2                | -1                | 0                | 0        |
| 3                | -1                | +1               | +1       |
| 4                | 0                 | -1               | 0        |
| 5                | 0                 | 0                | +1       |
| 6                | 0                 | +1               | -1       |
| 7                | +1                | -1               | +1       |
| 8                | +1                | 0                | -1       |
| 9                | +1                | +1               | 0        |

**Table S2.** ANOVA results for removal of extractives (%) under different extraction conditions.

| Source         | DF | Seq SS  | Adj SS  | Adj MS  | F        | P     | Contribution (%) | Rank |
|----------------|----|---------|---------|---------|----------|-------|------------------|------|
| Conc.          | 2  | 6.18380 | 6.18380 | 3.09190 | 30919.00 | 0.000 | 97.25            | 1    |
| Temp.          | 2  | 0.17420 | 0.17420 | 0.08710 | 871.00   | 0.001 | 2.74             | 2    |
| Time           | 2  | 0.00020 | 0.00020 | 0.00010 | 1.00     | 0.500 | 0.00             | 3    |
| Residual Error | 2  | 0.00020 | 0.00020 | 0.00010 |          |       | 0.00             |      |
| Total          | 8  | 6.35840 |         |         |          |       | 100              |      |

**Table S3.** ANOVA for removal of hemicellulose (%) under different extraction conditions.

| Source         | DF | Seq SS  | Adj SS  | Adj MS  | F      | P     | Contribution (%) | Rank |
|----------------|----|---------|---------|---------|--------|-------|------------------|------|
| Conc.          | 2  | 35.2822 | 35.2822 | 17.6411 | 260.28 | 0.004 | 64.35            | 1    |
| Temp.          | 2  | 19.2422 | 19.2422 | 9.6211  | 141.95 | 0.007 | 35.09            | 2    |
| time           | 2  | 0.1622  | 0.1622  | 0.0811  | 1.20   | 0.455 | 0.29             | 3    |
| Residual Error | 2  | 0.1356  | 0.1356  | 0.0678  |        |       |                  |      |
| Total          | 8  | 54.8222 |         |         |        |       |                  |      |

**Table S4.** ANOVA for removal of lignin (%) under different extraction conditions.

| Source   | DF | Seq SS  | Adj SS  | Adj MS  | F     | P     | Contribution (%) | Rank |
|----------|----|---------|---------|---------|-------|-------|------------------|------|
| Conc.    | 2  | 4.14927 | 4.14927 | 2.07463 | 45.80 | 0.021 | 81.47            | 1    |
| Temp.    | 2  | 0.38127 | 0.38127 | 0.19063 | 4.21  | 0.192 | 7.48             | 2    |
| time     | 2  | 0.47167 | 0.47167 | 0.23583 | 5.21  | 0.161 | 9.26             | 3    |
| Residual | 2  | 0.09060 | 0.09060 | 0.04530 |       |       |                  |      |
| Error    |    |         |         |         |       |       |                  |      |
| Total    | 8  | 5.09280 |         |         |       |       |                  |      |

Based on the multiple linear regression model chosen to fit the data, the relations between the non-cellulosic components removal percentage ( $R$  %) (Hemicellulose Removal (HR), Extractives Removal (ER) and Lignin Removal (LR) %), and the three selected independent variables; concentration, temperature and time ( $X_1$ ,  $X_2$  and  $X_3$ ), respectively with the regression coefficients ( $\beta_0$ ,  $\beta_1$ ,  $\beta_2$  and  $\beta_3$ ) are indicated in Eq. (S1–S4).

$$R\% = \beta_0 + \beta_1 X_1 + \beta_2 X_2 + \beta_3 X_3 + \beta_{12} X_1 \times X_2 + \beta_{13} X_1 \times X_3 + \beta_{23} X_2 \times X_3 \quad (S1)$$

$$ER\% = -14.4 - 0.207 X_1 + 0.109 X_2 + 7.27 X_3 + 0.00345 X_1 \times X_2 - 0.00171 X_1 \times X_3 - 0.0656 X_2 \times X_3 \quad (S2)$$

$$HR\% = -8.9 - 0.89 X_1 + 0.276 X_2 + 0.431 X_3 + 0.0266 X_1 \times X_2 - 0.0089 X_1 \times X_3 - 0.00560 X_2 \times X_3 \quad (S3)$$

$$LR\% = -10.39 - 0.229 X_1 + 0.092 X_2 + 0.221 X_3 + 0.0096 X_1 \times X_2 - 0.00580 X_1 \times X_3 - 0.00190 X_2 \times X_3 \quad (S4)$$
